# Supplementary material
Source: PubMed Central journal article supplement (PMC6175735)
Supplement: 13205_2018_1449_MOESM2_ESM.pdf [file 13205_2018_1449_MOESM2_ESM.pdf]

### Extra cellular enzyme production Analysis

An overnight culture of KCC-30 was used for the analysis of extra cellular enzymes. Megazyme assay kit (Bray, Co. Wicklow, Ireland) and API-ZYM kits (Marcy-I' Etoile, France) were used for the analysis of enzyme production.

**Table 1**

#### Analysis of intra and extra cellular enzyme production from KCC-30

|           | <b>Extracellular enzymes</b>       | <b>KCC-30</b> |
|-----------|------------------------------------|---------------|
| <b>1</b>  | Alkaline phosphatase               | ++            |
| <b>2</b>  | Esterase (C <sub>4</sub> )         | +++           |
| <b>3</b>  | Esterase lipase (C <sub>8</sub> )  | ++            |
| <b>4</b>  | Lipase (C <sub>14</sub> )          | ++            |
| <b>5</b>  | Leucine arylamidase                | ++            |
| <b>6</b>  | Valine arylamidase                 | ++            |
| <b>7</b>  | Cystine arylamidase                | +             |
| <b>8</b>  | Trypsin                            | +++           |
| <b>9</b>  | $\alpha$ -Chymotrypsin             | ++            |
| <b>10</b> | Acid phosphatase                   | +++           |
| <b>11</b> | Naphthol-AS-biphosphohydrolase     | +++           |
| <b>12</b> | $\alpha$ -Galactosidase            | ++            |
| <b>13</b> | $\beta$ -Galactosidase             | +++           |
| <b>14</b> | $\beta$ -Glucuronidase             | ++            |
| <b>15</b> | $\alpha$ -Glucosidase              | +++           |
| <b>16</b> | $\beta$ -Glucosidase               | +++           |
| <b>17</b> | N-Acetyl- $\beta$ -glucosaminidase | +             |
| <b>18</b> | $\alpha$ -Mannosidase              | ++            |
| <b>19</b> | $\alpha$ -Fucosidase               | ++            |

+, Weak production: ++; Moderate production: +++; Strong production

### Antibiotic Sensitivity Test of KCC-30

The screening of antibiotic sensitivity was tested by disc diffusion method as described in our previous paper (Arasu et al. 2014).

**Table 2**

Antibiotic sensitivity analysis of KCC30

| S. No | Name of Antibiotics              | Concentration( $\mu$ g) | KCC-30 |
|-------|----------------------------------|-------------------------|--------|
| 1     | Chloramphenicol (C)              | 50                      | S      |
| 2     | Kanamycin (K)                    | 30                      | S      |
| 3     | Nitrofurantoin (NIT)             | 50                      | R      |
| 4     | Tetracycline (TE)                | 100                     | S      |
| 5     | Streptomycin (S)                 | 25                      | S      |
| 6     | Sulphafurazole (SF)              | 300                     | S      |
| 7     | Colistin methane sulphonate (CL) | 100                     | S      |
| 8     | Dicloxacillin (D/C)              | 1                       | R      |
| 9     | Ampicillin (AMP)                 | 10                      | S      |
| 10    | Amikacin (AK)                    | 30                      | S      |
| 11    | Gentamicin (GEN)                 | 10                      | S      |
| 12    | Cefoxitin (CX)                   | 30                      | R      |
| 13    | Cefalexin (CN)                   | 30                      | S      |
| 14    | Cefuroxime (CXM)                 | 30                      | S      |
| 15    | Co-Trimoxazole (COT)             | 25                      | R      |

Susceptible= S: R=Resistant
