# Supplementary material
Source: PubMed Central journal article supplement (PMC6175735)

**Fig 1**  
**SEM image picture of KCC-30 grown on MRS medium**

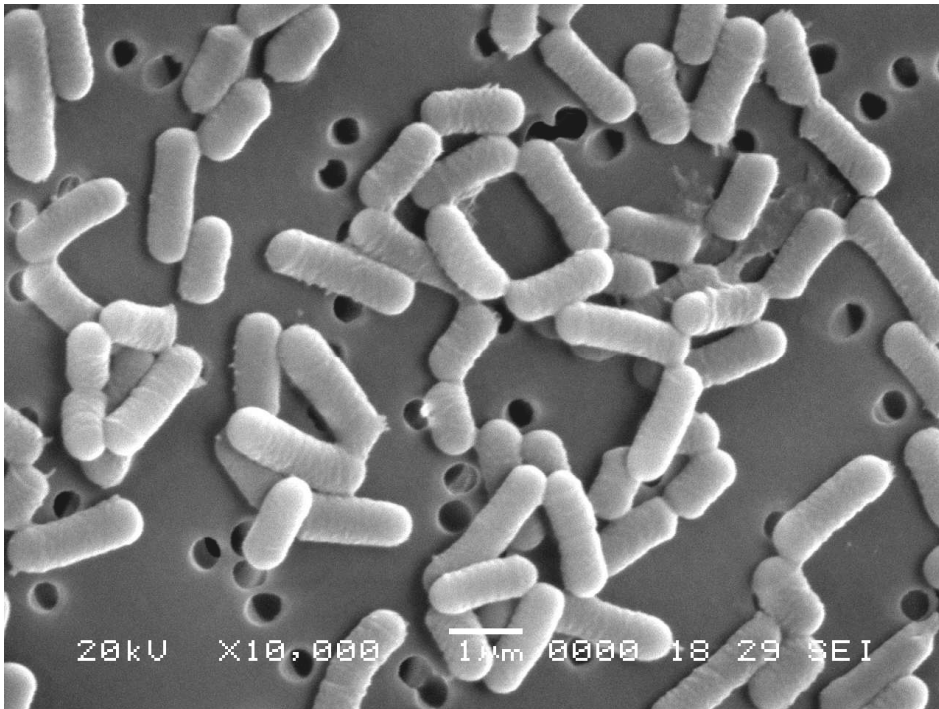

Supplement: 13205_2018_1449_MOESM1_ESM.pdf [file 13205_2018_1449_MOESM1_ESM.pdf]
